# Supplementary material for: Global Multi-Level Analysis of the ‘Scientific Food Web'
Source: PubMed Central journal article supplement — Sci Rep. 2013 Jan 30;3:1167. doi: 10.1038/srep01167 (PMC3558694; doi:10.1038/srep01167), 2013-01-30
Supplement: srep01167-s1.pdf [file srep01167-s1.pdf]

**Table S1:** Top 10 country ranking, based on the number of papers  $P$ , the number of citations  $C$ , the number of citations per paper  $C/P$ , and the scientific fitness  $K$ .

| Rank | P 2007-2009    | P 2007-2009 | C 2007-2009    | C 2007-2009 | C/P 2007-2009  | C/P 2007-2009 | K 2007-2009    | K 2007-2009 |
|------|----------------|-------------|----------------|-------------|----------------|---------------|----------------|-------------|
| 1    | USA            | 1263487     | USA            | 1922559     | Switzerland    | 1.795         | USA            | 0.0299      |
| 2    | China          | 315616      | United Kingdom | 397207      | Denmark        | 1.601         | United Kingdom | 0.0205      |
| 3    | United Kingdom | 291110      | Germany        | 354975      | Netherlands    | 1.582         | Germany        | 0.0170      |
| 4    | Germany        | 247151      | China          | 335800      | USA            | 1.522         | Canada         | 0.0108      |
| 5    | Japan          | 239669      | Japan          | 283537      | Sweden         | 1.489         | Netherlands    | 0.0100      |
| 6    | France         | 161873      | France         | 217867      | Germany        | 1.436         | Switzerland    | 0.0099      |
| 7    | Canada         | 155552      | Canada         | 202639      | Belgium        | 1.411         | France         | 0.0086      |
| 8    | Italy          | 148259      | Italy          | 184793      | Singapore      | 1.404         | Sweden         | 0.0049      |
| 9    | Spain          | 120244      | Spain          | 139274      | Finland        | 1.366         | Italy          | 0.0040      |
| 10   | India          | 110937      | Australia      | 131016      | United Kingdom | 1.364         | Denmark        | 0.0035      |

| Rank | P 2000-2002    | P 2000-2002 | C 2000-2002    | C 2000-2002 | C/P 2000-2002 | C/P 2000-2002 | K 2000-2002    | K 2000-2002 |
|------|----------------|-------------|----------------|-------------|---------------|---------------|----------------|-------------|
| 1    | USA            | 1042779     | USA            | 1389778     | Switzerland   | 1.653         | USA            | 0.0375      |
| 2    | United Kingdom | 258447      | United Kingdom | 277907      | Netherlands   | 1.351         | Germany        | 0.0177      |
| 3    | Japan          | 222299      | Germany        | 236317      | Denmark       | 1.345         | United Kingdom | 0.0144      |
| 4    | Germany        | 194759      | Japan          | 233676      | USA           | 1.333         | Switzerland    | 0.0125      |
| 5    | France         | 132401      | France         | 149633      | Sweden        | 1.298         | Netherlands    | 0.0099      |
| 6    | Canada         | 111299      | Canada         | 115394      | Finland       | 1.219         | France         | 0.0095      |
| 7    | Italy          | 97039       | Italy          | 101893      | Germany       | 1.213         | Canada         | 0.0077      |
| 8    | China          | 95736       | Netherlands    | 73377       | Belgium       | 1.152         | Sweden         | 0.0063      |
| 9    | Spain          | 68825       | Australia      | 65409       | Austria       | 1.137         | Denmark        | 0.0035      |
| 10   | Australia      | 68182       | Spain          | 63406       | France        | 1.130         | Belgium        | 0.0024      |

**Table S2:** Top 50 city ranking, based on the number of papers  $P$ , the number of citations  $C$ , the number of citations per paper  $C/P$ , and the scientific fitness  $K$ .

| Rank | P 2007-2009                | P 2007-2009 | C 2007-2009                | C 2007-2009 | C/P 2007-2009             | C/P 2007-2009 | K 2007-2009                | K 2007-2009 |
|------|----------------------------|-------------|----------------------------|-------------|---------------------------|---------------|----------------------------|-------------|
| 1    | London, UK                 | 62624       | Boston, MA, USA            | 100205      | Martinsried, Germany      | 5.234         | Boston, MA, USA            | 0.0117      |
| 2    | Beijing, China             | 59449       | London, UK                 | 90641       | Muelheim, Germany         | 5.207         | Cambridge, MA, USA         | 0.0074      |
| 3    | New York City, NY, USA     | 45992       | New York City, USA         | 79585       | Charlestown, MA, USA      | 4.396         | New York City, NY, USA     | 0.0062      |
| 4    | Seoul, South Korea         | 44934       | Beijing, China             | 69537       | La Jolla, CA, USA         | 3.240         | Bethesda, MD, USA          | 0.0061      |
| 5    | Tokyo, Japan               | 44058       | Tokyo, Japan               | 55884       | Versailles, France        | 3.206         | La Jolla, CA, USA          | 0.0052      |
| 6    | Boston, MA, USA            | 41988       | Cambridge, MA, USA         | 53558       | Pasadena, CA, USA         | 3.095         | Cambridge, UK              | 0.0043      |
| 7    | Chicago, IL, USA           | 39732       | Baltimore, MD, USA         | 47244       | Bethesda, MD, USA         | 3.026         | Baltimore, MD, USA         | 0.0042      |
| 8    | Paris, France              | 34581       | Paris, France              | 46567       | Cambridge, MA, USA        | 2.985         | Stanford, CA, USA          | 0.0041      |
| 9    | Shanghai, China            | 33179       | Bethesda, MD, USA          | 46069       | Greenbelt, MD             | 2.886         | London, UK                 | 0.0037      |
| 10   | Moscow, Russia             | 30132       | Seoul, South Korea         | 44518       | Garching, Germany         | 2.814         | Berkeley, CA, USA          | 0.0037      |
| 11   | Madrid, Spain              | 26958       | Los Angeles, CA, USA       | 43810       | Sutton, England           | 2.758         | Atlanta, GA, USA           | 0.0036      |
| 12   | Philadelphia, PA, USA      | 26259       | Philadelphia, PA, USA      | 43673       | Villejuif, France         | 2.739         | Seattle, WA, USA           | 0.0035      |
| 13   | Toronto, Canada            | 25710       | Houston, TX, USA           | 43249       | Yorktown Heights, NY, USA | 2.733         | Houston, TX, USA           | 0.0033      |
| 14   | Washington, D.C., USA      | 25554       | Shanghai, China            | 40797       | Frederick, MD, USA        | 2.698         | Los Angeles, CA, USA       | 0.0032      |
| 15   | Los Angeles, CA, USA       | 25317       | Cambridge, UK              | 40596       | Rehovot, Israel           | 2.686         | Ann Arbor, MI, USA         | 0.0031      |
| 16   | Baltimore, MD, USA         | 23831       | Toronto, Canada            | 39311       | Kawachi, Japan            | 2.654         | Philadelphia, PA, USA      | 0.0029      |
| 17   | Houston, TX, USA           | 23624       | Seattle, WA, USA           | 39104       | Stanford, CA, USA         | 2.637         | San Francisco, CA, USA     | 0.0029      |
| 18   | Taipei, Taiwan             | 22165       | Atlanta, GA, USA           | 38562       | Harlow, UK                | 2.612         | New Haven, CO, USA         | 0.0026      |
| 19   | Berlin, Germany            | 22145       | La Jolla, CA, USA          | 37999       | Rahway, NJ, USA           | 2.510         | Oxford, UK                 | 0.0025      |
| 20   | Rome, Italy                | 21084       | Chicago, IL, USA           | 37805       | Upton, NY, USA            | 2.504         | Durham, NC, USA            | 0.0023      |
| 21   | Barcelona, Spain           | 20972       | Ann Arbor, MI, USA         | 35103       | Berkeley, CA, USA         | 2.486         | Toronto, Canada            | 0.0020      |
| 22   | Montreal, Canada           | 20948       | Madrid, Spain              | 32626       | Tarragona, Spain          | 2.467         | Pasadena, CA, USA          | 0.0020      |
| 23   | Seattle, WA, USA           | 19960       | San Francisco, CA, USA     | 32269       | Cambridge, UK             | 2.416         | Zurich, Switzerland        | 0.0020      |
| 24   | Atlanta, GA, USA           | 19668       | Stanford, CA, USA          | 31863       | Abbott Park, IL, USA      | 2.390         | St. Louis, MO, USA         | 0.0019      |
| 25   | Singapore                  | 19182       | Berkeley, CA, USA          | 30718       | Boston, MA, USA           | 2.387         | Dallas, TX, USA            | 0.0018      |
| 26   | Sao Paulo, Brazil          | 19021       | Montreal, Canada           | 30612       | Evanston, IL, USA         | 2.289         | Maddison, WI, USA          | 0.0017      |
| 27   | Tehran, Iran               | 18896       | Oxford, UK                 | 30168       | Illkrich, France          | 2.266         | Heidelberg, Germany        | 0.0017      |
| 28   | Pittsburgh, PA, USA        | 18065       | Berlin, Germany            | 29976       | Santa Barbara, CA, USA    | 2.256         | Princeton, NJ, USA         | 0.0016      |
| 29   | Cambridge, MA, USA         | 17944       | Zurich, Switzerland        | 28700       | Princeton, NJ, USA        | 2.240         | Chapel Hill, NC, USA       | 0.0016      |
| 30   | Milan, Italy               | 17628       | Pittsburgh, PA, USA        | 28270       | Oak Ridge, TN, USA        | 2.237         | Amsterdam, The Netherlands | 0.0016      |
| 31   | Ann Arbor, MI, USA         | 17590       | Amsterdam, The Netherlands | 27480       | Golden, CO, USA           | 2.227         | Pittsburgh, PA, USA        | 0.0015      |
| 32   | Nanjing, China             | 17549       | Singapore, Singapore       | 27365       | Boulder, CO, USA          | 2.226         | Rochester, MN, USA         | 0.0013      |
| 33   | San Francisco, CA, USA     | 17339       | Barcelona, Spain           | 27130       | New Haven, CO, USA        | 2.206         | Utrecht, The Netherlands   | 0.0013      |
| 34   | Munich, Germany            | 17165       | Rome, Italy                | 25806       | Santa Cruz, CA, USA       | 2.198         | Evanston, IL, USA          | 0.0013      |
| 35   | Cambridge, UK              | 16804       | Milan, Italy               | 24786       | Palo Alto, CA, USA        | 2.197         | Boulder, CO, USA           | 0.0012      |
| 36   | Sidney, Australia          | 16282       | St. Louis, MO, USA         | 24466       | Gif Sur Yvette, France    | 2.180         | Kyoto, Japan               | 0.0012      |
| 37   | Amsterdam, The Netherlands | 16237       | New Haven, CO, USA         | 24299       | Dallas, TX, USA           | 2.175         | Stockholm, Sweden          | 0.0012      |
| 38   | Ankara, Turkey             | 16224       | Kyoto, Japan               | 24105       | Duarte, CA, USA           | 2.173         | Geneve, Switzerland        | 0.0011      |
| 39   | Oxford, UK                 | 15956       | Durham, NC, USA            | 23904       | Potsdam, Germany          | 2.148         | Cleveland, OH, USA         | 0.0011      |
| 40   | Wuhan, China               | 15246       | Chinese Taipei, Taiwan     | 23547       | Rockville, MD, USA        | 2.132         | Minneapolis, MN, USA       | 0.0010      |
| 41   | Bethesda, MD, USA          | 15225       | Maddison, WI, USA          | 23165       | Göttingen, Germany        | 2.127         | Santa Barbara, CA, USA     | 0.0010      |
| 42   | Vienna, Austria            | 15162       | Munich, Germany            | 23043       | Neuburg, Germany          | 2.120         | Montreal, Canada           | 0.0010      |
| 43   | Zurich, Switzerland        | 14618       | Stockholm, Sweden          | 22133       | Argonne, IL, USA          | 2.105         | Basel, Switzerland         | 0.0010      |
| 44   | Kyoto, Japan               | 14374       | Vancouver, Canada          | 20877       | Dundee, Scotland          | 2.104         | Göttingen, Germany         | 0.0010      |
| 45   | San Diego, CA, USA         | 14064       | Sydney, Australia          | 20317       | Richtland, WA, USA        | 2.090         | Rotterdam, The Netherlands | 0.0010      |
| 46   | Hangzhou, China            | 13942       | Vienna, Austria            | 20015       | Reykjavik, ICELAND        | 2.065         | Vancouver, Canada          | 0.0010      |
| 47   | Athens, Greece             | 13743       | Cleveland, OH, USA         | 19724       | Heidelberg, Germany       | 2.062         | Lausanne, Switzerland      | 0.0009      |
| 48   | Stockholm, Sweden          | 13552       | Heidelberg, Germany        | 19468       | West Point, PA, USA       | 2.050         | Leiden, The Netherlands    | 0.0009      |
| 49   | Vancouver, Canada          | 13334       | Rochester, MN, USA         | 19051       | Roskilde, Denmark         | 2.050         | Rehovot, Israel            | 0.0009      |
| 50   | St. Louis, MO, USA         | 13219       | Washington, DC, USA        | 18999       | Durham, NC, USA           | 2.047         | Copenhagen, Denmark        | 0.0009      |

| Rank | P 2000-2002                | P 2000-2002 | C 2000-2002                | C 2000-2002 | C/P 2000-2002             | C/P 2000-2002 | K 2000-2002                | K 2000-2002 |
|------|----------------------------|-------------|----------------------------|-------------|---------------------------|---------------|----------------------------|-------------|
| 1    | London, UK                 | 55119       | Boston, MA, USA            | 74420       | S San Francisco, CA, USA  | 4.838         | Boston, MA, USA            | 0.0143      |
| 2    | New York City, NY, USA     | 38575       | London, UK                 | 67093       | Martinsried, Germany      | 4.576         | Bethesda, MD, USA          | 0.0092      |
| 3    | Tokyo, Japan               | 37642       | New York City, NY, USA     | 60276       | Charlestown, MA, USA      | 4.286         | La Jolla, CA, USA          | 0.0078      |
| 4    | Boston, MA, USA            | 32677       | Tokyo, Japan               | 44847       | Illkrich, France          | 3.565         | New York City, NY, USA     | 0.0082      |
| 5    | Moscow, Russia             | 28262       | Bethesda, MD, USA          | 42047       | Muelheim, Germany         | 3.357         | Cambridge, MA, USA         | 0.0077      |
| 6    | Paris, France              | 28248       | Baltimore, MD, USA         | 37426       | La Jolla, CA, USA         | 3.223         | Baltimore, MD, USA         | 0.0060      |
| 7    | Chicago, IL, USA           | 24125       | San Diego, CA, USA         | 36513       | Murray Hill, NJ, USA      | 2.973         | Stanford, CA, USA          | 0.0050      |
| 8    | Beijing, China             | 23024       | Cambridge, MA, USA         | 35686       | Frederick, MD, USA        | 2.931         | Cambridge, UK              | 0.0048      |
| 9    | Los Angeles, CA, USA       | 22714       | Paris, France              | 34930       | Bethesda, MD, USA         | 2.836         | San Francisco, CA, USA     | 0.0048      |
| 10   | Philadelphia, PA, USA      | 22120       | Philadelphia, PA, USA      | 33544       | Rockville, MD, USA        | 2.805         | Seattle, WA, USA           | 0.0046      |
| 11   | Baltimore, MD, USA         | 19684       | Los Angeles, CA, USA       | 32742       | Harlow, UK                | 2.682         | Philadelphia, PA, USA      | 0.0040      |
| 12   | Seoul, South Korea         | 19485       | Seattle, WA, USA           | 30007       | West Point, PA, USA       | 2.677         | Berkeley, CA, USA          | 0.0040      |
| 13   | Washington, D.C., USA      | 19353       | Houston, TX, USA           | 29383       | Pasadena, CA, USA         | 2.553         | Evanston, IL, USA          | 0.0039      |
| 14   | Houston, TX, USA           | 18754       | Cambridge, UK              | 29370       | Yorktown Heights, NY, USA | 2.404         | London, UK                 | 0.0038      |
| 15   | Toronto, Canada            | 17750       | Chicago, IL, USA           | 26061       | Stanford, CA, USA         | 2.377         | Houston, TX, USA           | 0.0034      |
| 16   | Berlin, Germany            | 17395       | San Francisco, CA, USA     | 24659       | Cambridge, MA, USA        | 2.359         | Los Angeles, CA, USA       | 0.0034      |
| 17   | Madrid, Spain              | 17248       | Toronto, Canada            | 24533       | Villejuif, France         | 2.322         | St. Louis, MO, USA         | 0.0028      |
| 18   | Seattle, WA, USA           | 15927       | Stanford, CA, USA          | 23520       | Rahway, NJ, USA           | 2.301         | Oxford, UK                 | 0.0027      |
| 19   | Cambridge, MA, USA         | 15129       | Berkeley, CA, USA          | 21938       | Basel, Switzerland        | 2.278         | Dallas, TX, USA            | 0.0026      |
| 20   | Cambridge, UK              | 15054       | Oxford, UK                 | 21718       | Boston, MA, US            | 2.277         | Toronto, Canada            | 0.0025      |
| 21   | Bethesda, MD, USA          | 14827       | Berlin, Germany            | 21504       | Garching, Germany         | 2.276         | Pasadena, CA, USA          | 0.0024      |
| 22   | Montreal, Canada           | 14742       | Ann Arbor, MI, USA         | 20560       | Rehovot, Israel           | 2.231         | Ann Arbor, MI, USA         | 0.0024      |
| 23   | Atlanta, GA, USA           | 14409       | St. Louis, MO, USA         | 20240       | Dallas, TX, USA           | 2.230         | Atlanta, GA, USA           | 0.0022      |
| 24   | Oxford, UK                 | 14048       | New Haven, CT, USA         | 20196       | San Francisco, CA, USA    | 2.180         | Princeton, NJ, USA         | 0.0022      |
| 25   | Rome, Italy                | 13931       | Atlanta, GA, USA           | 20196       | Kashiwa, Japan            | 2.178         | Rockville, MD, USA         | 0.0021      |
| 26   | Ann Arbor, MI, USA         | 13755       | Madrid, Spain              | 18292       | New Haven, CO, USA        | 2.147         | Heidelberg, Germany        | 0.0021      |
| 27   | Pittsburgh, PA, USA        | 13421       | Pittsburgh, PA, USA        | 18001       | Palo Alto, CA, USA        | 2.110         | Durham, NC, USA            | 0.0019      |
| 28   | Taipei, Taiwan             | 12345       | Kyoto, Japan               | 17564       | Chapel Hill, NC, USA      | 2.105         | Zurich, Switzerland        | 0.0018      |
| 29   | Kyoto, Japan               | 12018       | Amsterdam, The Netherlands | 17492       | Greenbelt, MD, USA        | 2.097         | Geneve, Switzerland        | 0.0018      |
| 30   | Tsukuba, Japan             | 11925       | Montreal, Canada           | 17331       | Okazaki, Japan            | 2.057         | Maddison, WI, USA          | 0.0017      |
| 31   | Vienna, Austria            | 11684       | Zurich, Switzerland        | 16502       | Duarte, CA, USA           | 2.032         | Amsterdam, The Netherlands | 0.0016      |
| 32   | Barcelona, Spain           | 11643       | Madison, WI, USA           | 15659       | Upton, NY, USA            | 2.006         | Basel, Switzerland         | 0.0016      |
| 33   | Munich, Germany            | 11553       | Cleveland, OH, USA         | 15356       | Heidelberg, Germany       | 1.981         | Chapel Hill, NC, USA       | 0.0016      |
| 34   | Cleveland, OH, USA         | 11503       | Munich, Germany            | 15290       | Princeton, NJ, USA        | 1.970         | Paris, France              | 0.0015      |
| 35   | Milan, Italy               | 11402       | Stockholm, Sweden          | 15225       | Cambridge, UK             | 1.951         | Rochester, MN, USA         | 0.0015      |
| 36   | St. Louis, MO, USA         | 11395       | Milan, Italy               | 15215       | Huddinge, Sweden          | 1.946         | Nashville, TN, USA         | 0.0014      |
| 37   | San Diego, CA, USA         | 11328       | Washington, DC, USA        | 14859       | Berkeley, CA, USA         | 1.937         | Pittsburgh, PA, USA        | 0.0014      |
| 38   | Berkeley, CA, USA          | 11327       | Tsukuba, Japan             | 14572       | Baltimore, MD, USA        | 1.901         | Cleveland, OH, USA         | 0.0014      |
| 39   | San Francisco, CA, USA     | 11309       | Seoul, South Korea         | 14515       | Farmington, CT, USA       | 1.886         | Kyoto, Japan               | 0.0013      |
| 40   | Singapore                  | 11307       | Durham, NC, USA            | 14405       | Seattle, WA, USA          | 1.884         | Stockholm, Sweden          | 0.0013      |
| 41   | Amsterdam, The Netherlands | 11232       | Dallas, TX, USA            | 14248       | Piscataway, NJ, USA       | 1.864         | Garching, Germany          | 0.0012      |
| 42   | Madison, WI, USA           | 10640       | Vienna, Austria            | 14056       | Geneve, Switzerland       | 1.848         | Minneapolis, MN, USA       | 0.0012      |
| 43   | Stockholm, Sweden          | 10613       | Rome, Italy                | 13921       | Wilrijk, Belgium          | 1.843         | Charlestown, MA, USA       | 0.0012      |
| 44   | Shanghai, China            | 10034       | Heidelberg, Germany        | 13913       | Gif Sur Yvette, France    | 1.842         | Ithaca, NY, USA            | 0.0011      |
| 45   | Stanford, CA, USA          | 9893        | Minneapolis, MN, USA       | 12913       | Versailles, France        | 1.838         | San Diego, CA, USA         | 0.0011      |
| 46   | Minneapolis, MN, USA       | 9815        | Barcelona, Spain           | 12850       | King of Prussia, PA, USA  | 1.827         | Osaka, Japan               | 0.0011      |
| 47   | Zurich, Switzerland        | 9662        | Beijing, China             | 12687       | Dundee, Scotland          | 1.793         | Murray Hill, NJ, USA       | 0.0011      |
| 48   | Sidney, Australia          | 9471        | Rochester, MN, USA         | 12658       | Sutton, UK                | 1.784         | Denver, CO, USA            | 0.0011      |
| 49   | New Haven, CT, USA         | 9405        | Chapel Hill, NC, USA       | 12607       | Valhalla, NY, USA         | 1.782         | Rehovot, Israel            | 0.0011      |
| 50   | Sao Paulo, Brazil          | 9236        | Princeton, NJ, USA         | 12244       | St. Louis, MO, USA        | 1.776         | Munich, Germany            | 0.0011      |
